# Supplementary material for: A role for PVRL4-driven cell–cell interactions in tumorigenesis
Source: eLife journal article supplement (doi:10.7554/elife.00358), 2013-04-30
Supplement: figures [file elife-00358-figures-v1.pdf]

---

## Figures and figure supplements

A role for PVRL4-driven cell–cell interactions in tumorigenesis

**Natalya N Pavlova, et al.**

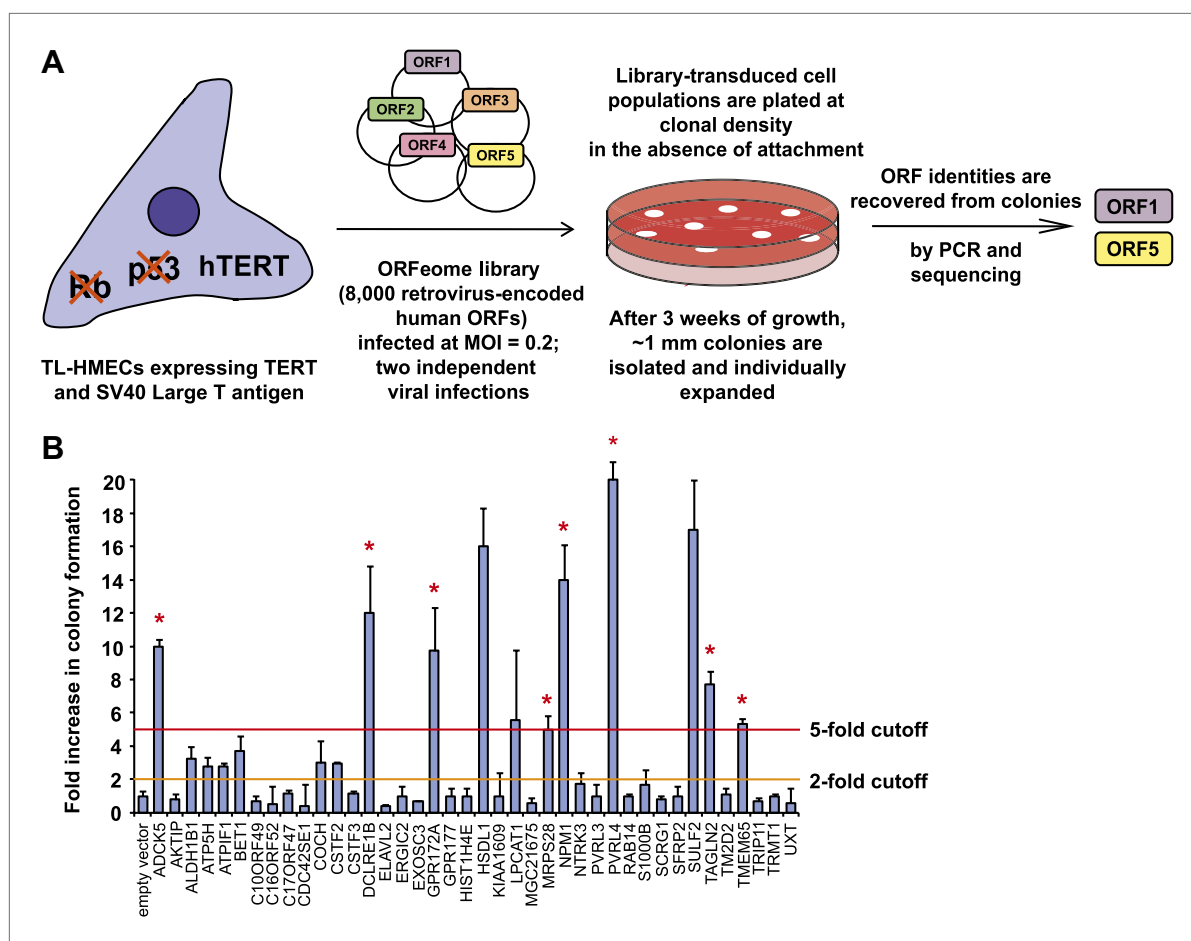

**Figure 1.** A genetic screen for drivers of anchorage-independent growth in human mammary epithelial cells. **(A)** A schematic of the screen. TL-HMECs were transduced with the ORFeome library (8000 CMV promoter-driven human open reading frames [ORFs] in a retroviral vector) at a multiplicity of infection (MOI) of 0.2 and plated into semi-solid medium. Macroscopic colonies were isolated, individually expanded, and the identities of ORF inserts were determined by sequencing. **(B)** ORFs recovered from two independent screen replicates were individually transduced into TL-HMECs and plated into semi-solid medium. Colonies were counted and colony numbers were normalized to an empty vector-transduced sample. Asterisks denote strongly validated ORFs that localize to focal amplification peaks in at least one tumor subtype. Assays were performed in triplicate (error bars  $\pm$  SD).

DOI: [10.7554/eLife.00358.003](https://doi.org/10.7554/eLife.00358.003)

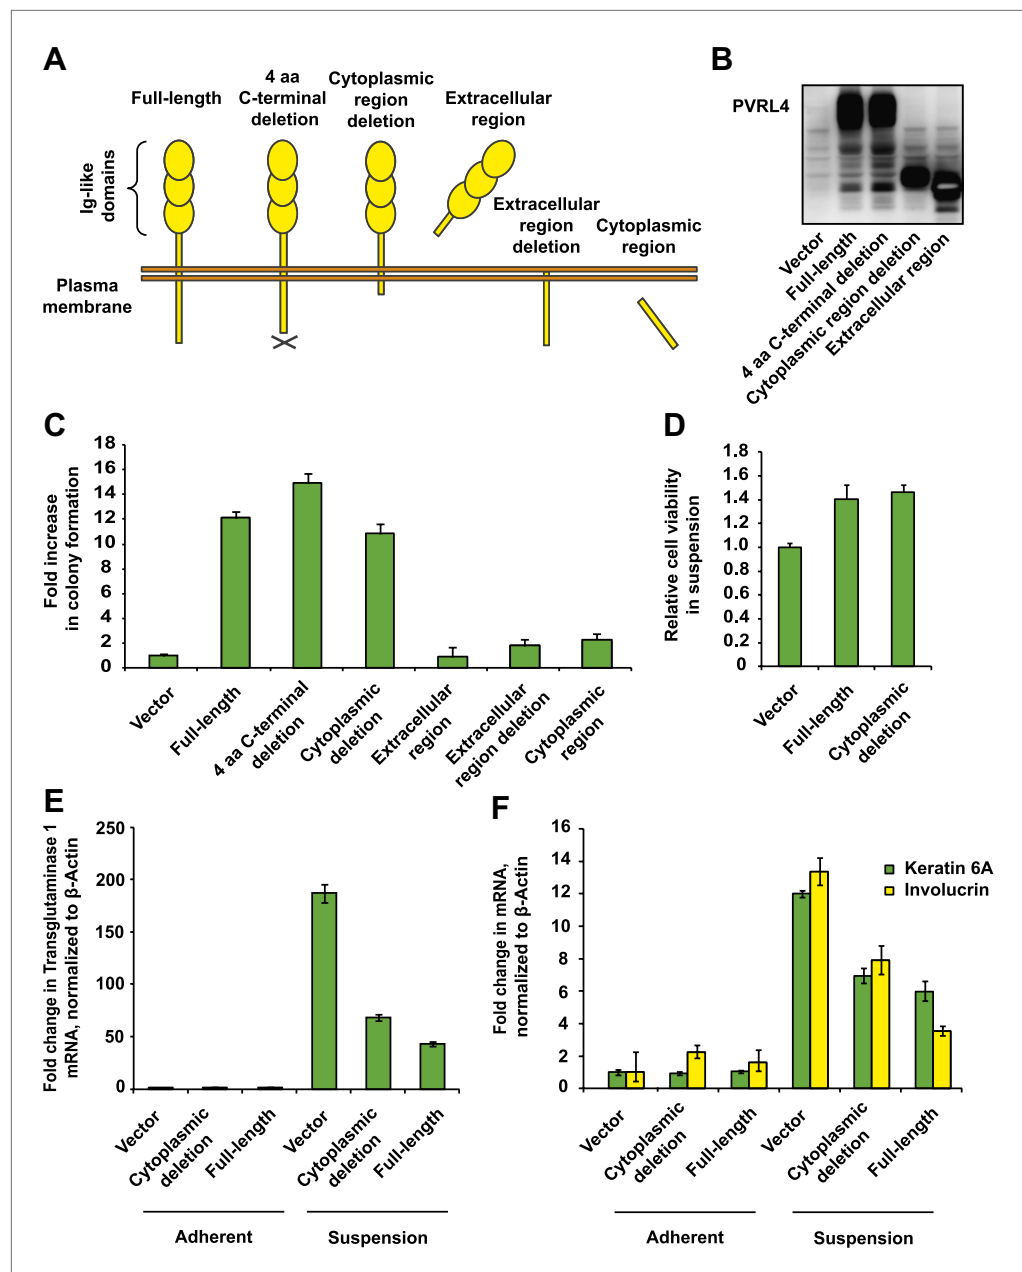

**Figure 2.** PVRL4-induced anchorage-independent colony formation is carried out through its extracellular region. (A) and (B) A series of PVRL4 deletion constructs were designed and their expression confirmed by Western blot. (C) PVRL4 mutants from (A) were tested for their ability to induce anchorage-independent colony formation in triplicate (error bars  $\pm$  SD). (D) Cells with full-length PVRL4 or the cytoplasmic region deletion mutant were assayed for viability under conditions of anchorage deprivation by measuring total ATP content in cells cultured on ultra-low attachment plates for 72 hr. Values were normalized to an empty vector-transduced sample. Assays were performed in triplicate (error bars  $\pm$  SD). (E) and (F) TL-HMECs expressing empty vector, full-length PVRL4 or cytoplasmic region deletion mutant containing cells were cultured on tissue culture-treated (adherent) or ultra-low attachment (suspension) dishes for 72 hr. RNA was isolated and mRNA levels for TGM1 (E) and KRT6A and IVL (F) were measured by RT-qPCR. Transcript levels were normalized to  $\beta$ -actin. qPCR was performed in quadruplicate (error bars  $\pm$  SD).

DOI: 10.7554/eLife.00358.004

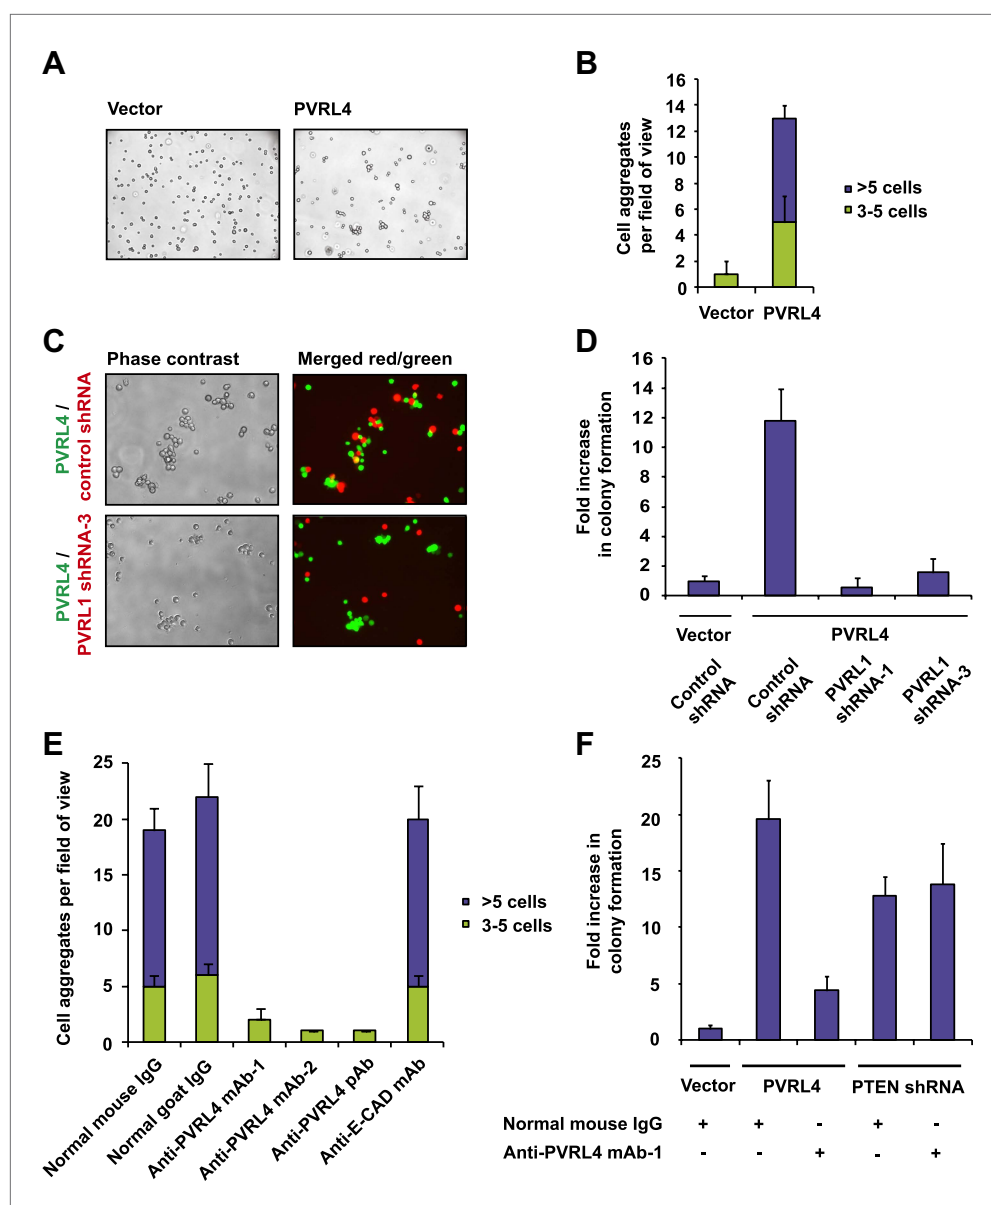

**Figure 3.** PVRL4 facilitates cell-to-cell attachment, inhibition of which suppresses anchorage-independence. (A) and (B) PVRL4 promotes cell clustering of TL-HMECs. Cells were dissociated off the tissue culture surface with trypsin-free cell dissociation buffer and kept in suspension for 1 hr. Small (3–5 cells) and large (>5 cells) cell clusters per field of view were counted,  $n = 3$  (error bars  $\pm$  SD). (C) GFP-labeled PVRL4-expressing TL-HMECs were allowed to aggregate with dsRed-labeled cells expressing either a PVRL1-targeting shRNA or a control shRNA. Representative phase-contrast and fluorescent images (red and green channels superimposed) are shown. (D) PVRL4 was co-expressed with the indicated shRNAs and anchorage-independent colony formation in TL-HMECs was assayed. Values were normalized to an empty vector-transduced sample. Assays were performed in triplicate (error bars  $\pm$  SD). (E) PVRL4-expressing TL-HMECs were assayed for clustering in the presence of the indicated antibodies or isotype controls. Cell clusters were quantified as before. (F) Anchorage-independent growth induced by PVRL4 or an shRNA against PTEN was assayed in the presence of PVRL4-targeting antibody or control IgG. Colony numbers were normalized to the control sample. Anchorage-independent colony formation assays were performed in triplicate (error bars  $\pm$  SD).

DOI: [10.7554/eLife.00358.005](https://doi.org/10.7554/eLife.00358.005)

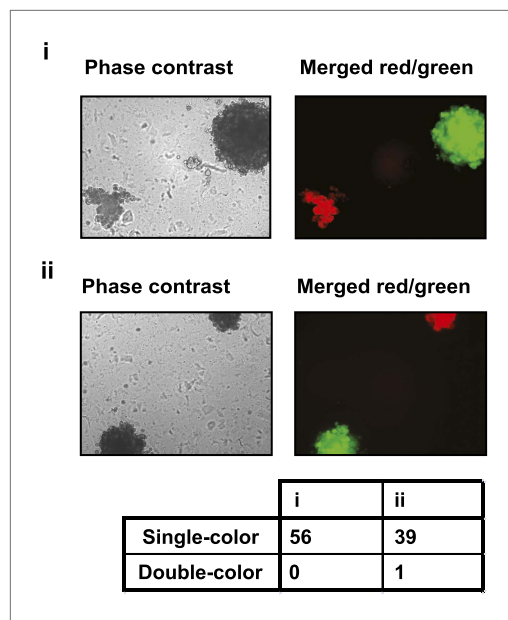

**Figure 3—figure supplement 1.** PVRL4-driven anchorage-independent colonies originate from single cells. PVRL4 expressing TL-HMECs were stably transduced with dsRed or GFP and mixed in equal proportions, followed by (i) immediate plating into semi-solid medium, or (ii) co-culturing on an adherent surface for 2 d, followed by plating into semi-solid medium. Resulting colonies were visualized under a fluorescent microscope and each colony was assessed for the presence of red and green fluorescence. Representative phase-contrast and fluorescent images (red and green channels) are shown.

DOI: [10.7554/eLife.00358.006](https://doi.org/10.7554/eLife.00358.006)

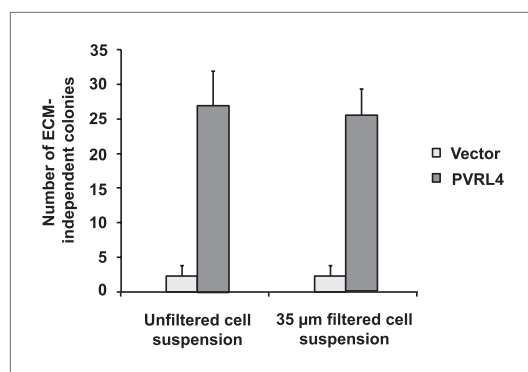

**Figure 3—figure supplement 2.** Potential preformed clusters of TL-HMECs do not contribute to anchorage-independent colony numbers. The colony formation efficiency of TL-HMECs transduced with empty vector or vector expressing PVRL4 was compared between unfiltered cell suspensions and cell suspensions that were filtered through a 35 µm nylon mesh strainer prior to plating into methylcellulose. Anchorage-independent colony formation assays were performed in triplicate (error bars  $\pm$  SD).

DOI: [10.7554/eLife.00358.007](https://doi.org/10.7554/eLife.00358.007)

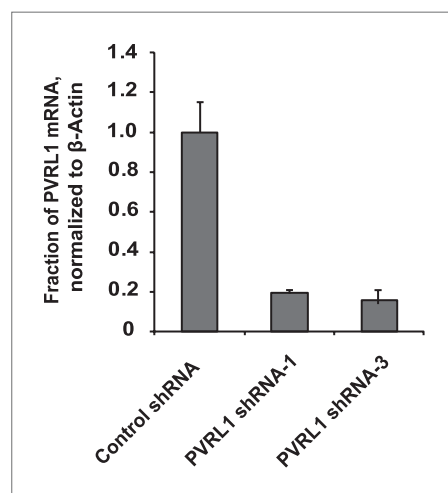

**Figure 3—figure supplement 3.** Depletion efficiency of individual anti-PVRL1 shRNAs. efficiency of shRNA-mediated PVRL1 mRNA depletion was measured by RT-qPCR. PVRL1 transcript abundance was normalized to β-actin. qPCR was performed in quadruplicate (error bars  $\pm$  SD).

DOI: [10.7554/eLife.00358.008](https://doi.org/10.7554/eLife.00358.008)

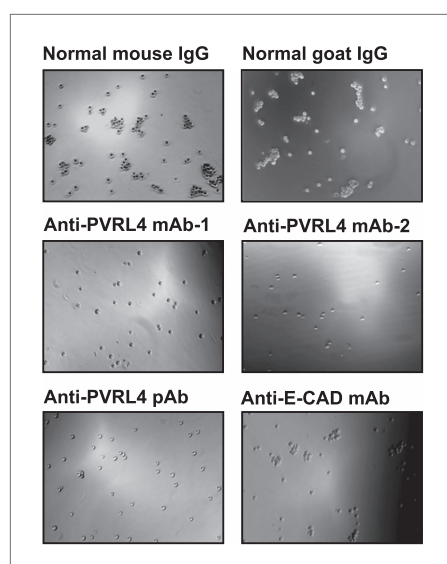

**Figure 3—figure supplement 4.** Anti-PVRL4 antibodies block PVRL4-driven cell–cell clustering. PVRL4-expressing TL-HMECs were allowed to aggregate in the presence of the indicated antibodies or isotype controls. Representative images are shown.

DOI: [10.7554/eLife.00358.009](https://doi.org/10.7554/eLife.00358.009)

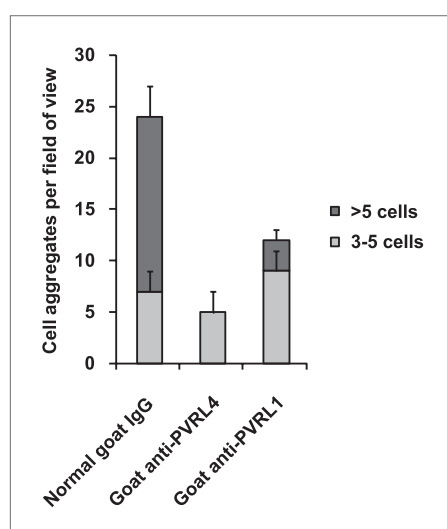

**Figure 3—figure supplement 5.** PVRL4-driven cell–cell clustering is inhibited by antibodies against PVRL1. PVRL4-expressing TL-HMECs were assayed for clustering in the presence of the indicated antibodies or isotype controls. Cell clusters were quantified as before.

DOI: [10.7554/eLife.00358.010](https://doi.org/10.7554/eLife.00358.010)

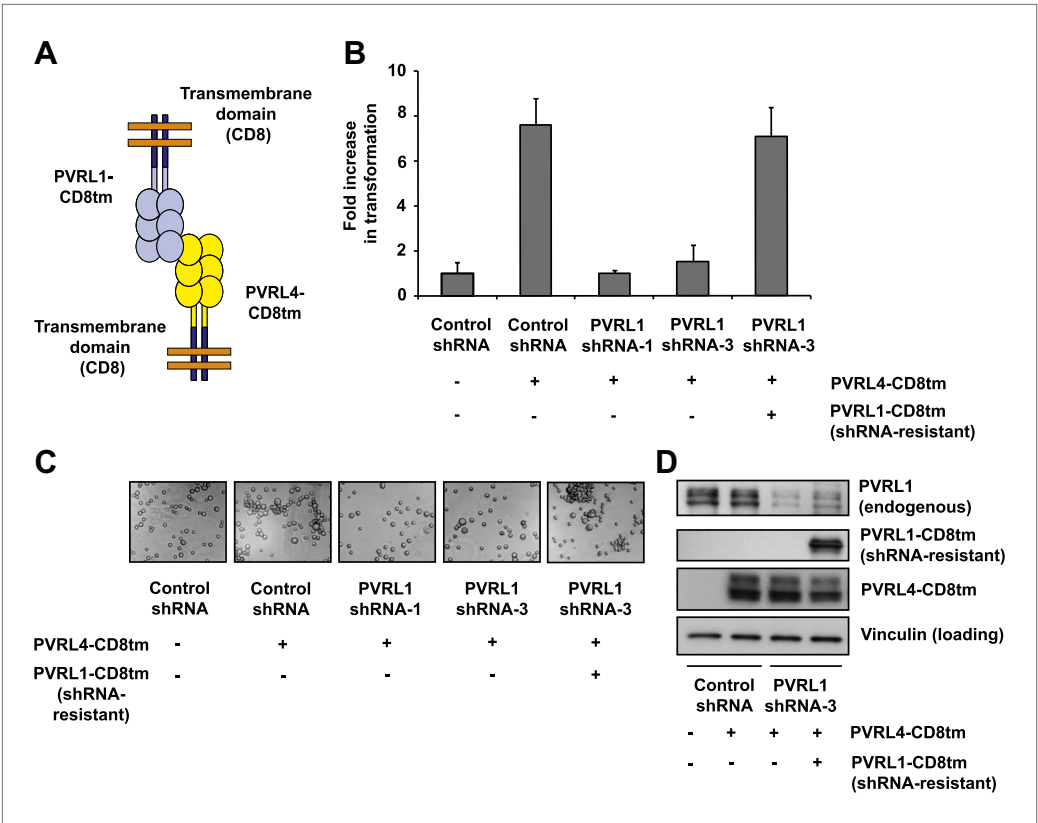

**Figure 4.** Expression of extracellular regions of PVRL4 and PVRL1 on the cell surface is sufficient for anchorage-independence. **(A)** Schematics of chimeric constructs containing extracellular domains of PVRL4 or an shRNA-resistant version of PVRL1 fused to the transmembrane domain of CD8 (blue). **(B)** and **(C)** TL-HMECs were stably transduced with the indicated combinations of expression constructs and assayed for anchorage-independent growth **(B)** and clustering **(C)**. Colony numbers were normalized to the control sample. Anchorage-independent colony formation assays were performed in triplicate (error bars  $\pm$  SD). **(D)** Expression levels of endogenous and chimeric proteins were verified by Western blot.  
DOI: 10.7554/eLife.00358.011

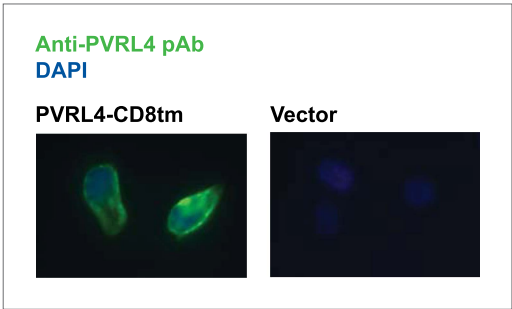

**Figure 4—figure supplement 1.** Plasma membrane localization of PVRL4-CD8tm construct in TL-HMECs. TL-HMEC cells infected with PVRL4-CD8tm or empty vector were fixed with methanol and stained with goat polyclonal anti-PVRL4 antibody followed by anti-goat Alexa Fluor 488 secondary antibody.  
DOI: 10.7554/eLife.00358.012

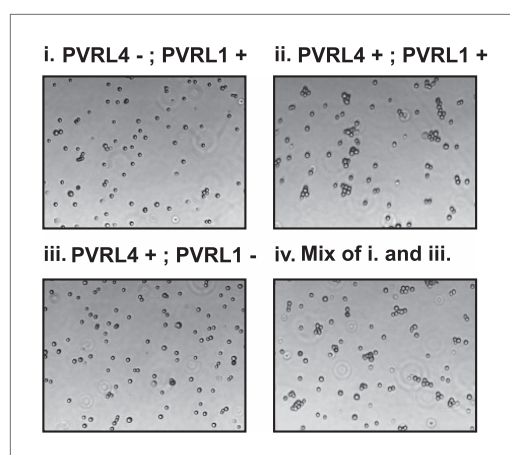

**Figure 4—figure supplement 2.** Cell–cell clustering is driven by PVRL4-PVRL1 trans-interactions between individual cells. Clustering assays were performed with TL-HMECs expressing the following transgenes: (i) empty vector/control shRNA; (ii) PVRL4-CD8tm/control shRNA; (iii) PVRL4-CD8tm/anti-PVRL1 shRNA; and (iv) a 1:1 mixture of (iii) and (i).

DOI: [10.7554/eLife.00358.013](https://doi.org/10.7554/eLife.00358.013)

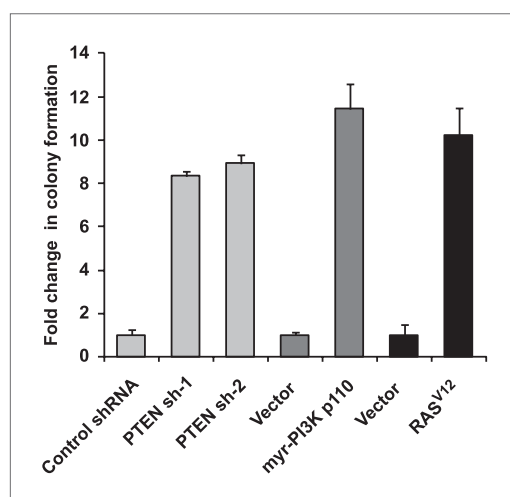

**Figure 4—figure supplement 3.** Expression of shRNA constructs against PTEN or constitutively active mutants of RAS and PI3K induces anchorage-independent growth. TL-HMECs transduced with the indicated constructs were assayed for ability to induce anchorage-independent colony formation in triplicate (error bars  $\pm$  SD).

DOI: [10.7554/eLife.00358.014](https://doi.org/10.7554/eLife.00358.014)

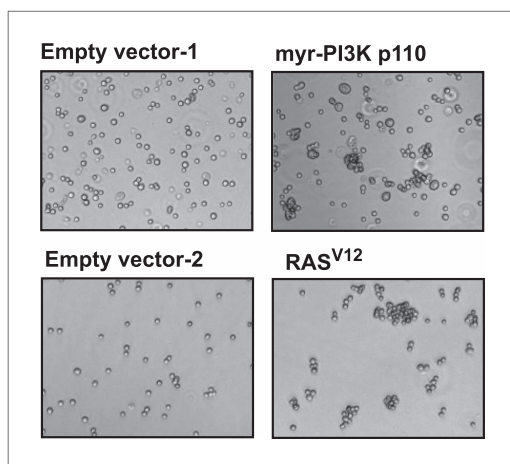

**Figure 4—figure supplement 4.** Constitutively active mutants of RAS and PI3K induce cell–cell clustering. TL-HMECs were stably transduced with the indicated constructs and assayed for cell–cell clustering and colony formation in the absence of substratum anchorage. Representative clustering assay images are shown.

DOI: [10.7554/eLife.00358.015](https://doi.org/10.7554/eLife.00358.015)

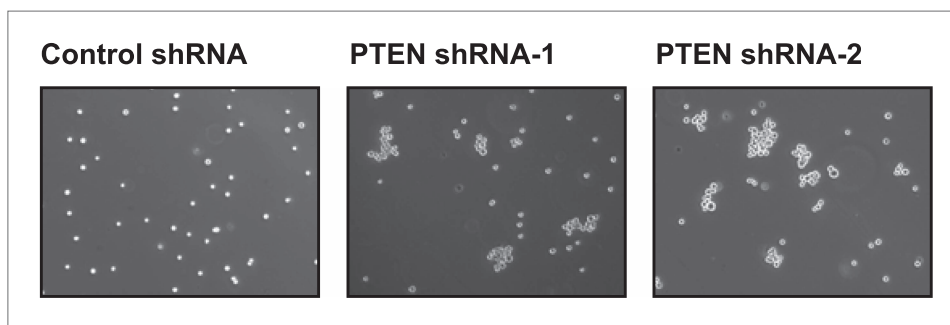

**Figure 4—figure supplement 5.** PTEN depletion induces cell–cell clustering. TL-HMECs expressing two independent PTEN shRNAs or control shRNA were assayed for cell–cell clustering. Representative images are shown.

DOI: [10.7554/eLife.00358.016](https://doi.org/10.7554/eLife.00358.016)

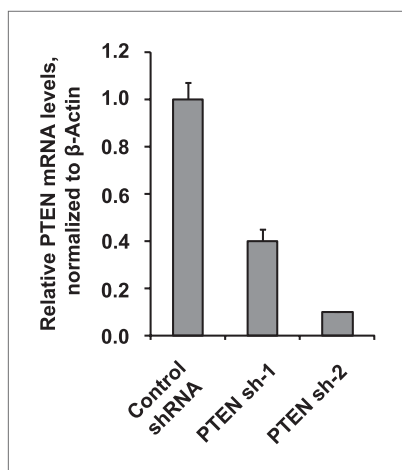

**Figure 4—figure supplement 6.**

Depletion efficiency of individual anti-PTEN shRNAs. The efficiency of PTEN mRNA depletion was measured by RT-qPCR. PTEN transcript abundance was normalized to  $\beta$ -actin. qPCR was performed in quadruplicate (error bars  $\pm$  SD).

DOI: [10.7554/eLife.00358.017](https://doi.org/10.7554/eLife.00358.017)

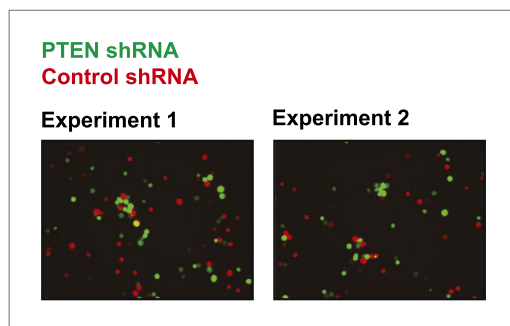

**Figure 4—figure supplement 7.** Cell-cell clustering induced by depletion of PTEN is heterotypic.

GFP-labeled PTEN-depleted TL-HMECs were allowed to aggregate with dsRed-labeled control shRNA-expressing cells. Images were taken and processed as before. Representative images are shown.

DOI: [10.7554/eLife.00358.018](https://doi.org/10.7554/eLife.00358.018)

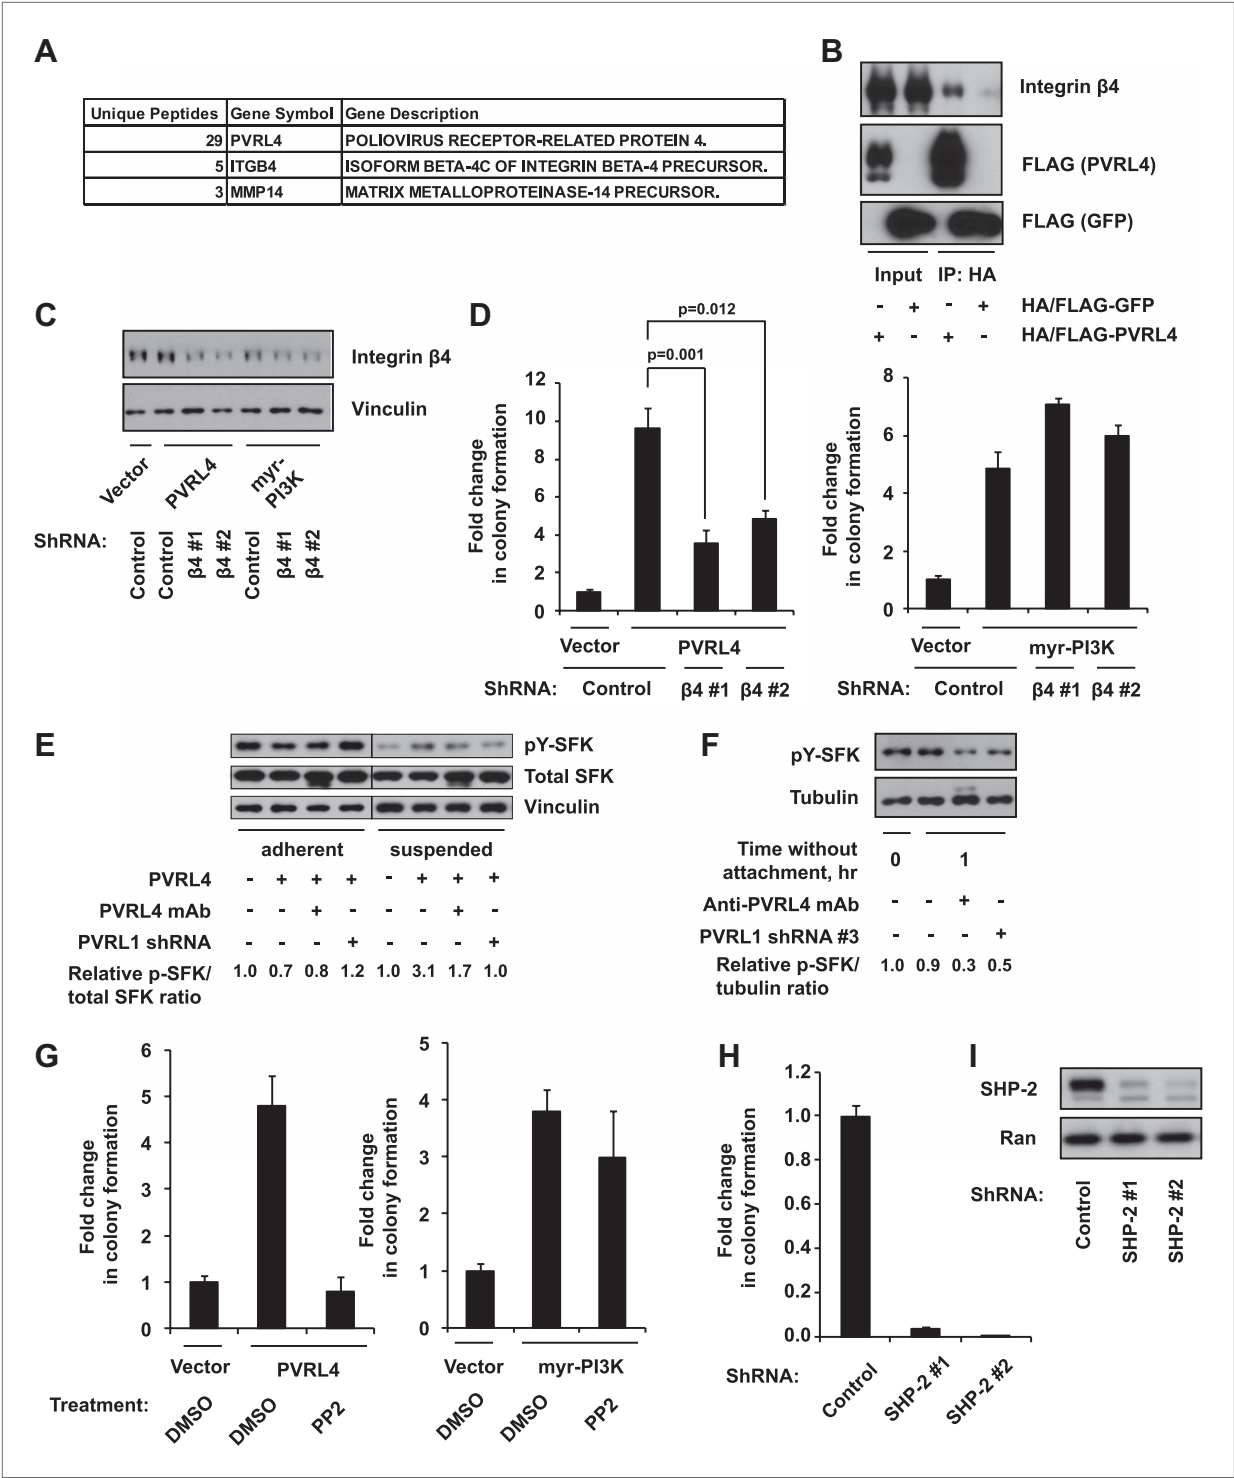

**Figure 5.** PVRL4-driven cell-to-cell attachment promotes anchorage-independence via integrin  $\beta 4$ -associated signaling. **(A)** Cell surface-localized proteins interacting with HA/FLAG-tagged PVRL4, but not with HA/FLAG-tagged GFP, as determined by mass spectrometry. **(B)** TL-HMECs expressing HA/FLAG tagged PVRL4 or HA/FLAG-tagged GFP were detached from the adherent surface with the enzyme-free cell dissociation buffer and incubated in suspension for 1 hr. Immunoprecipitations were performed with HA beads, followed by Western blot with FLAG and integrin  $\beta 4$  antibody. **(C)** TL-HMECs expressing vector control, PVRL4, or myr-PI3K were stably transduced with the indicated shRNA constructs and integrin  $\beta 4$  levels were assayed by Western blot. **(D)** TL-HMECs from **(C)** were assayed for anchorage-independent colony formation. Colony numbers were normalized to the vector control sample. Assays were performed in triplicate (error bars  $\pm$  SD). **(E)** TL-HMECs stably transduced with the indicated constructs were detached from the adherent surface with enzyme-free cell dissociation buffer and incubated in 0.5% methylcellulose in suspension for 6 hr or cultured on Figure 5. Continued on next page

Figure 5. Continued

an adherent surface for 48 hr. Levels of pY416-SFK (Src family kinases), total SFK, and vinculin loading control were measured by Western blot. Band intensity was measured with ImageJ software. (F) PVRL4-expressing TL-HMEC cells transduced with control or anti-PVRL1 shRNA were incubated in suspension in the conditions indicated. Levels of pY416-SFK (Src family kinases) and tubulin loading control were measured by Western blot. Band intensity was measured with ImageJ software. (G) TL-HMECs stably expressing PVRL4 or control vector were assayed for anchorage-independent colony formation in the presence of PP2 or vehicle control. Colony numbers were normalized to the vector sample. Assays were performed in triplicate (error bars  $\pm$  SD). (H) TL-HMECs expressing PVRL4 were stably transduced with the indicated shRNA constructs and assayed for anchorage-independent colony formation. Colony numbers were normalized to the vector control sample. Assays were performed in triplicate (error bars  $\pm$  SD). (I) SHP-2 levels were assayed by Western blot in TL-HMEC lysates from (H).

DOI: 10.7554/eLife.00358.019

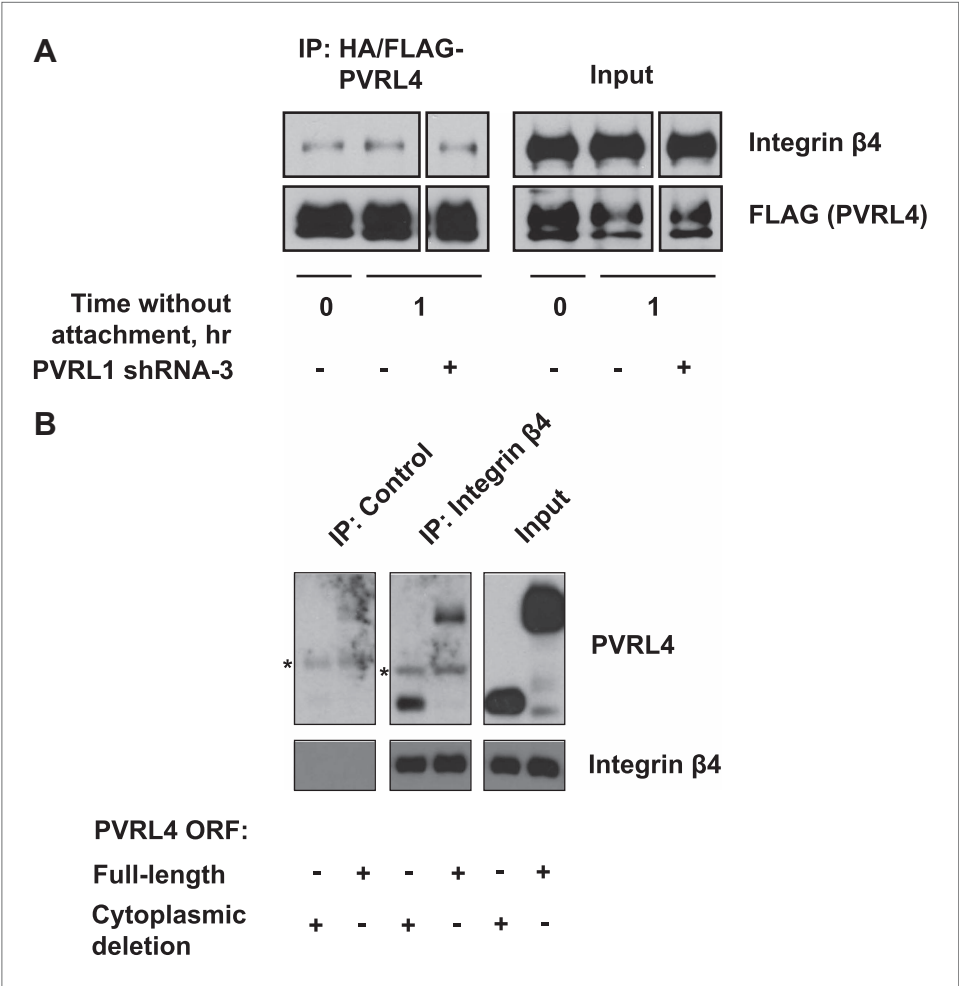

**Figure 5—figure supplement 1.** Interaction of PVRL4 with integrin  $\beta$ 4. (A) Anti-HA beads were used to immunoprecipitate HA/FLAG-PVRL4 from the indicated lysates. Immunoprecipitates were blotted with anti-integrin  $\beta$ 4 and anti-FLAG antibodies. (B) Immunoprecipitations with anti-integrin  $\beta$ 4 antibodies or with a control IgG were performed from TL-HMEC lysates expressing either full-length PVRL4 or its cytoplasmic deletion mutant. Immunoprecipitates and input lysates were blotted with anti-integrin  $\beta$ 4 and anti-PVRL4 antibodies. Asterisks denote heavy chains of control and anti-integrin  $\beta$ 4 antibodies, which cross-react with an anti-goat secondary antibody.

DOI: 10.7554/eLife.00358.020

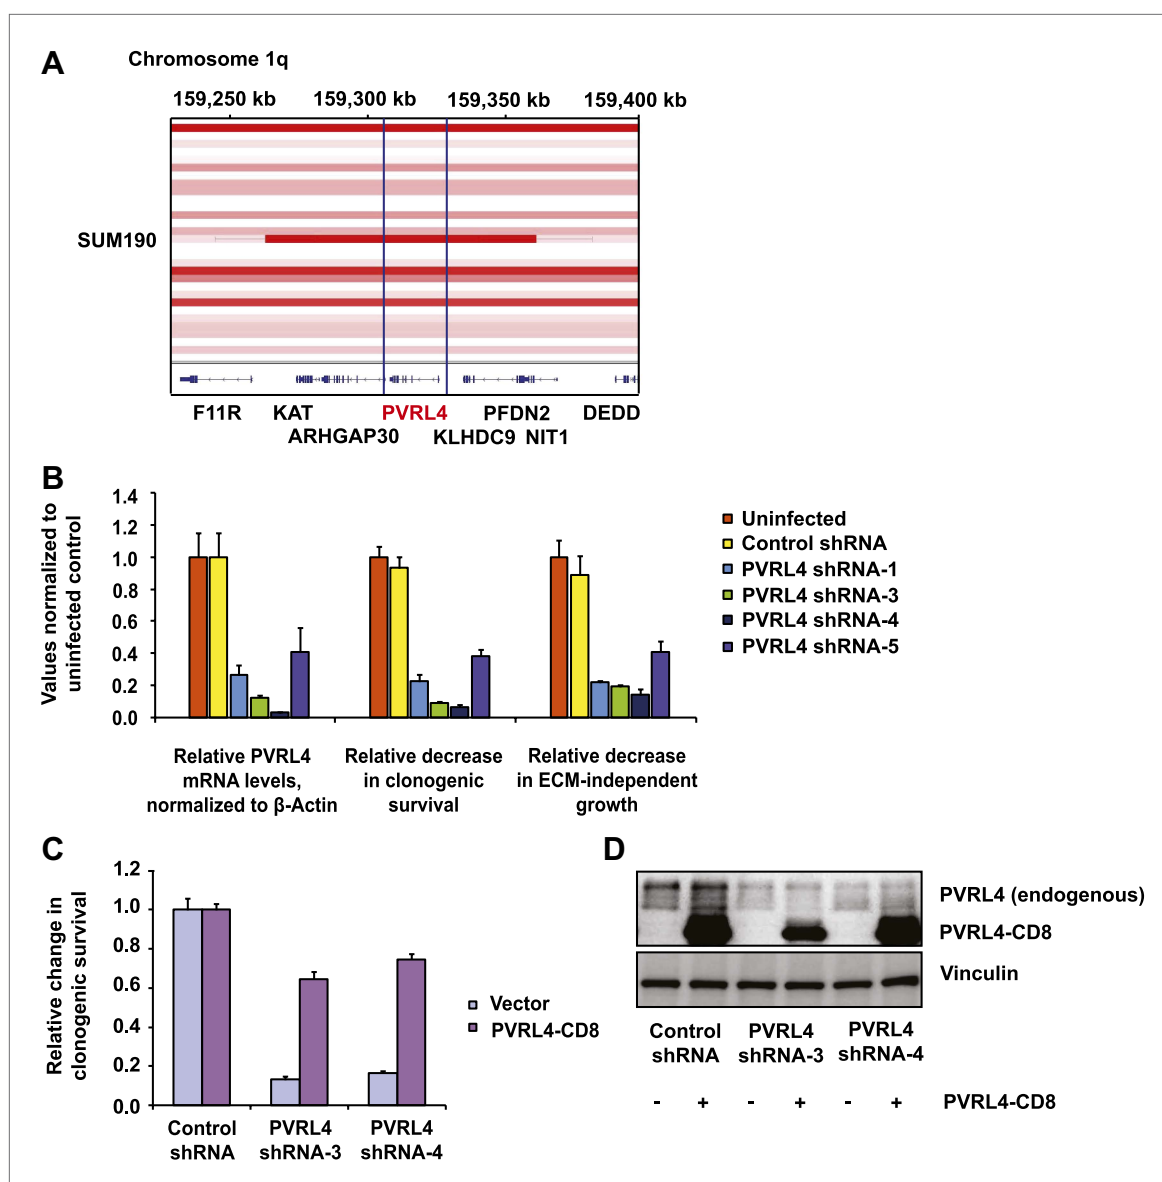

**Figure 6.** PVRL4 is amplified in breast cancer and is essential for the transformed phenotype of cancer cells. **(A)** A view from the integrated Genome Viewer program showing focal amplification of the PVRL4 locus in SUM190 cells. The degree of amplification is denoted by the intensity of the color. **(B)** PVRL4 mRNA was stably depleted from SUM190 cells by four independent shRNAs. Transcript levels were measured by RT-qPCR and normalized to  $\beta$ -actin. qPCR was performed in quadruplicate (error bars  $\pm$  SD). PVRL4-depleted and control cells were assayed for clonogenic survival and anchorage-independent colony formation. Assays were performed in triplicate (error bars  $\pm$  SD). All values were normalized to the uninfected control sample. ECM: extracellular matrix. **(C)** The PVRL4-CD8 chimeric construct was used to rescue the defect in clonogenic survival observed with RNAi-mediated PVRL4 depletion. Assays were performed in triplicate (error bars  $\pm$  SD). Colony numbers were normalized to the control shRNA sample. **(D)** Expression levels of endogenous and chimeric proteins were verified by Western blot.

DOI: [10.7554/eLife.00358.021](https://doi.org/10.7554/eLife.00358.021)

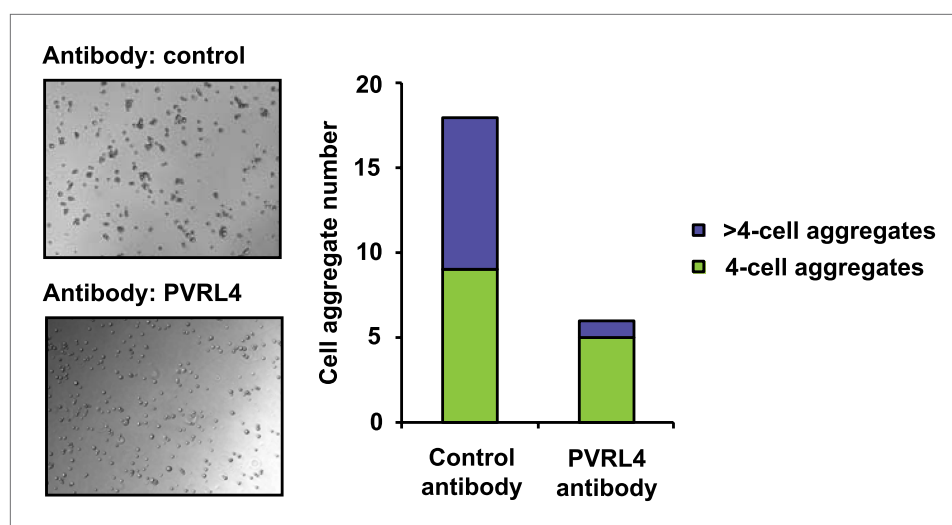

**Figure 6—figure supplement 1.** PVRL4 induces clustering of SUM190 cells which is blocked by antibodies against PVRL4. SUM190 cells were assayed for cell–cell clustering in the presence of the indicated antibodies. Four-cell clusters and clusters with more than four cells from representative images were scored separately.

DOI: [10.7554/eLife.00358.022](https://doi.org/10.7554/eLife.00358.022)

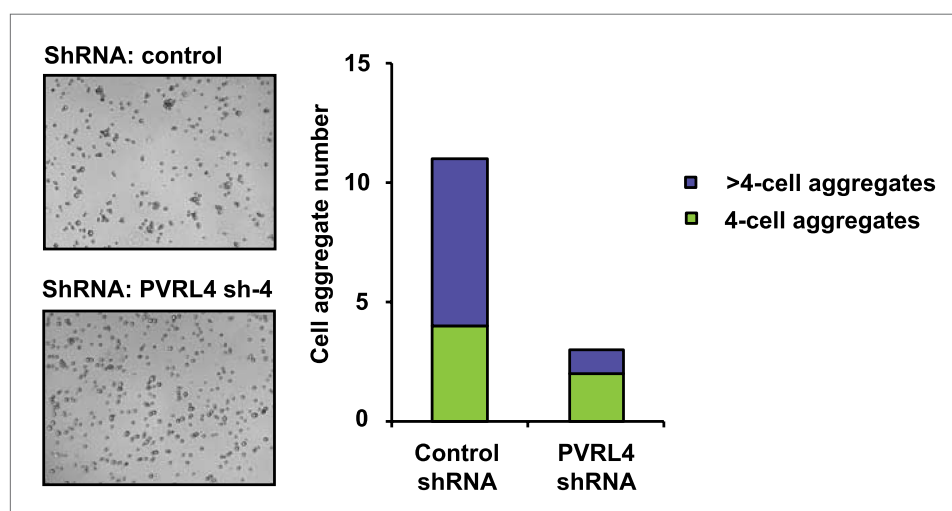

**Figure 6—figure supplement 2.** PVRL4 induces clustering of SUM190 cells which is blocked by RNAi against PVRL4. SUM190 cells were assayed for cell–cell clustering in the presence of the indicated shRNAs. Four-cell clusters and clusters with more than four cells from representative images were scored separately.

DOI: [10.7554/eLife.00358.023](https://doi.org/10.7554/eLife.00358.023)

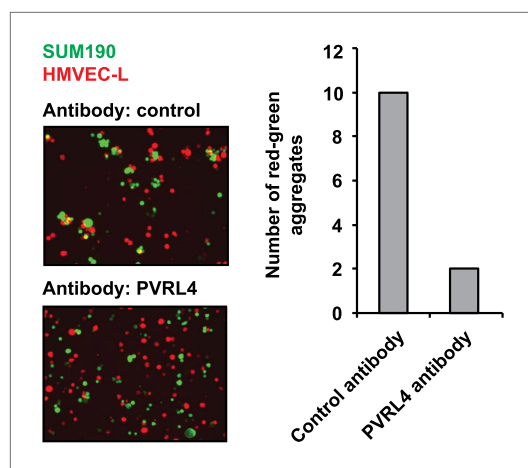

**Figure 6—figure supplement 3.** PVRL4 induces attachment of SUM190 cells to microvascular endothelial cells which is blocked by antibodies against PVRL4. SUM190 cells (GFP) were assayed for heterotypic clustering with HMVEC-L cells (dsRed) in the presence of the indicated antibodies. Clusters with at least three cells incorporating both green and red cells from representative images were counted.

DOI: [10.7554/eLife.00358.024](https://doi.org/10.7554/eLife.00358.024)

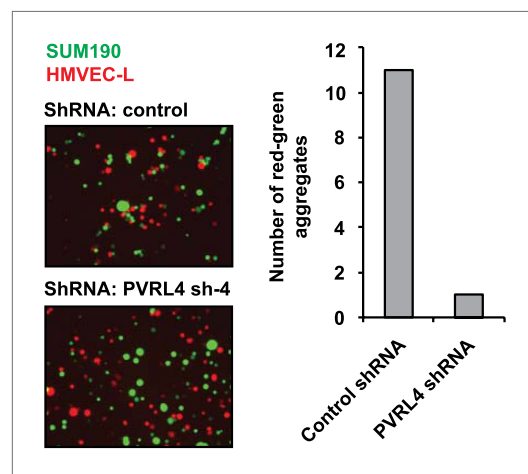

**Figure 6—figure supplement 4.** PVRL4 induces attachment of SUM190 cells to microvascular endothelial cells which is blocked by RNAi against PVRL4. SUM190 cells (GFP) were assayed for heterotypic clustering with HMVEC-L cells (dsRed) in the presence of the indicated shRNAs. Clusters with at least three cells incorporating both green and red cells from representative images were counted.

DOI: [10.7554/eLife.00358.025](https://doi.org/10.7554/eLife.00358.025)

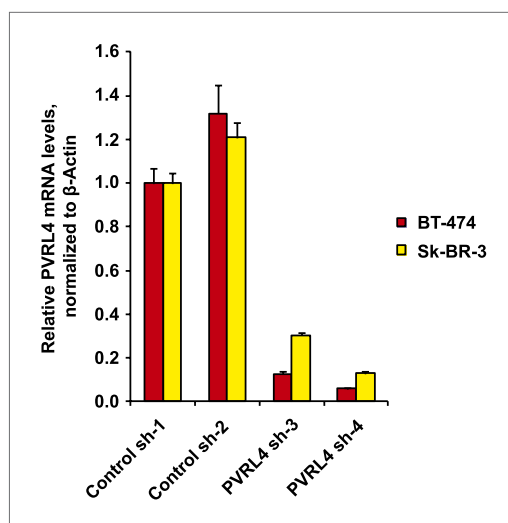

**Figure 6—figure supplement 5.** Stable depletion of PVRL4 transcript in BT-474 and Sk-BR-3 cell lines.

PVRL4 transcript levels were measured by RT-qPCR and normalized to  $\beta$ -actin. qPCR was performed in quadruplicate (error bars  $\pm$  SD).

DOI: [10.7554/eLife.00358.026](https://doi.org/10.7554/eLife.00358.026)

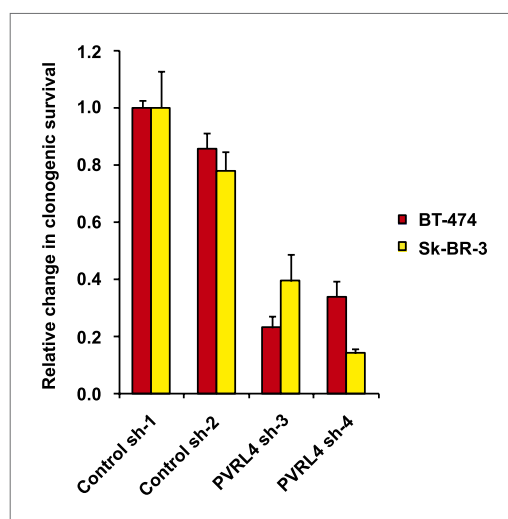

**Figure 6—figure supplement 6.** PVRL4 depletion affects clonogenic growth of BT-474 and Sk-BR-3 cell lines. The clonogenic potential of the indicated cell lines in the presence of control or PVRL4 shRNA constructs was assessed. Assays were performed in triplicate (error bars  $\pm$  SD). Colony numbers were normalized to the control shRNA sample.

DOI: [10.7554/eLife.00358.027](https://doi.org/10.7554/eLife.00358.027)

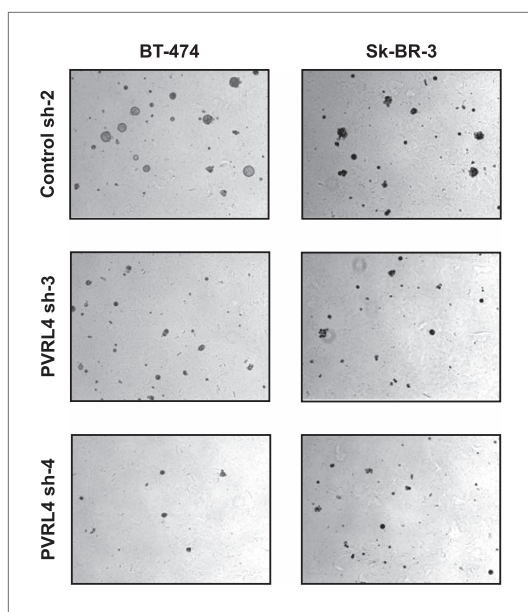

**Figure 6—figure supplement 7.** PVRL4 depletion affects anchorage-independent growth of BT-474 and Sk-BR-3 cell lines. Cell line growth in methylcellulose-containing media on an ultra-low attachment surface was assessed in the presence of control or PVRL4 shRNA constructs. Representative images are shown. DOI: [10.7554/eLife.00358.028](https://doi.org/10.7554/eLife.00358.028)

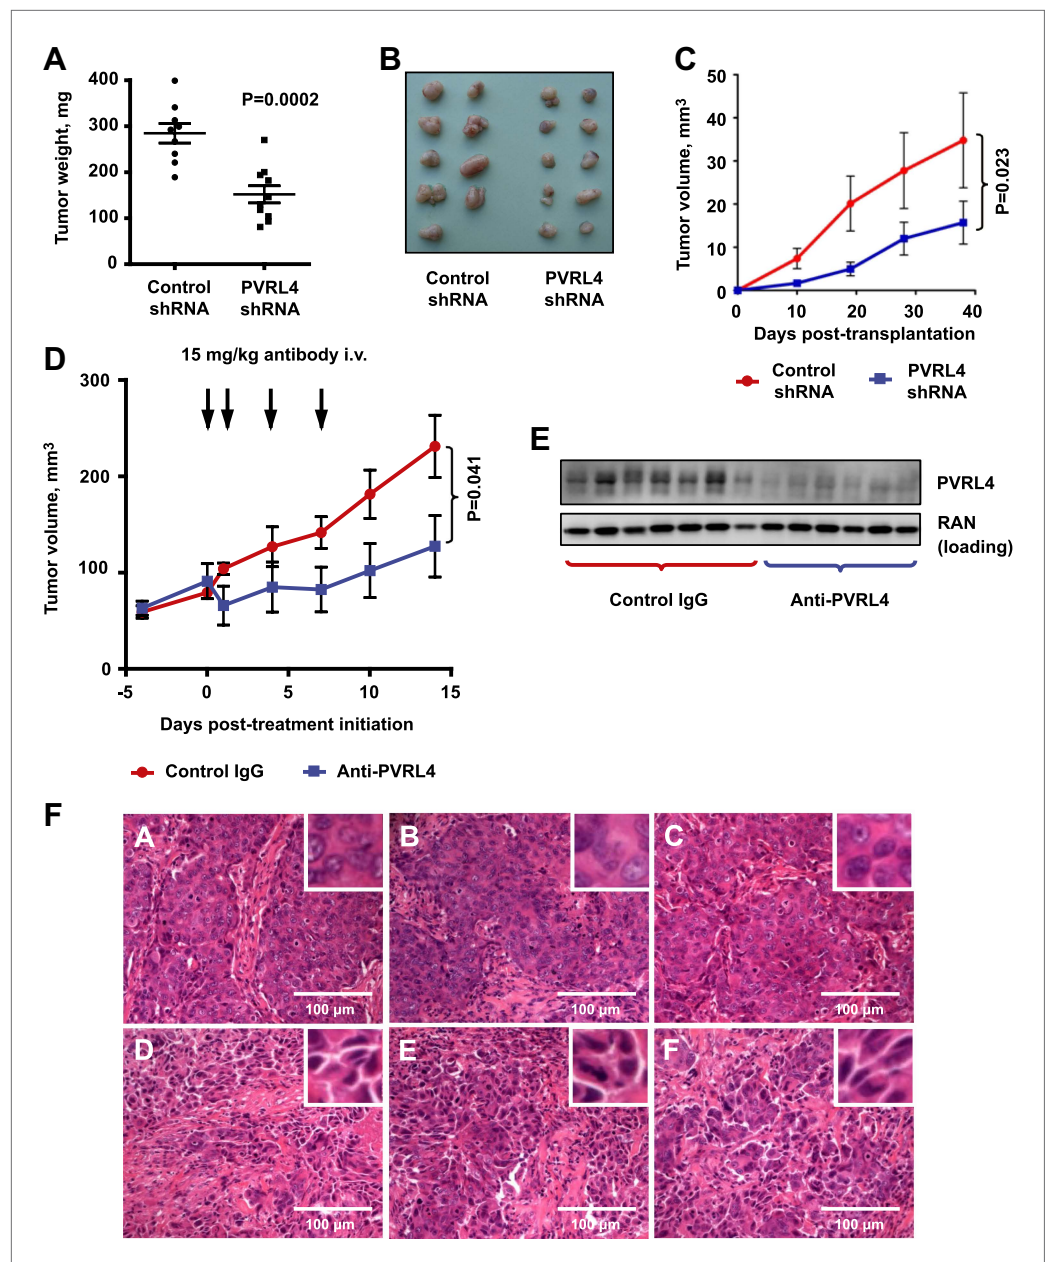

**Figure 7.** Targeting PVRL4 inhibits tumor growth. (A) and (B) Female nude mice were injected into their mammary fat pads with SUM190 cells expressing PVRL4-targeted or control shRNA ( $n = 10$  per group, error bars  $\pm$  SEM). The resulting tumors were excised, scaled (A), and photographed (B). (C) SUM185 cells were stably transduced with PVRL4-targeted or control shRNA and injected into the mammary fat pads of female nude mice ( $n = 10$  per group, error bars  $\pm$  SEM). Tumor volume was measured with calipers at the indicated time points. (D) Female nude mice with  $\sim 50$  mm<sup>3</sup> SUM190-eGFP xenografts were randomized into two cohorts ( $n = 7$  per group) and injected with anti-PVRL4 monoclonal antibodies or control IgG on the indicated days. Tumor volume was measured with calipers (error bars  $\pm$  SEM). (E) Levels of PVRL4 protein were measured in tumor lysates from anti-PVRL4 antibody or control-treated mice, 7 days after the last treatment. (F) Tumor sections from control IgG (A–C) or anti-PVRL4 antibody-treated (D–F) mice were stained with hematoxylin/eosin and photographed. Representative images are shown.

DOI: [10.7554/eLife.00358.029](https://doi.org/10.7554/eLife.00358.029)

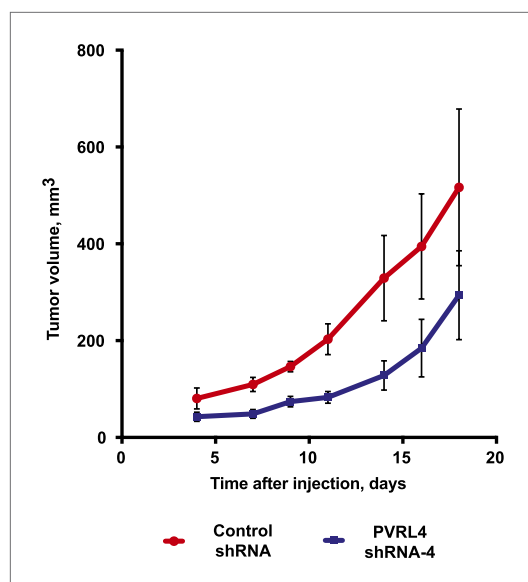

**Figure 7—figure supplement 1.** PVRL4 depletion inhibits BT-474 xenograft growth. BT-474 cells were transduced with the indicated shRNA constructs and injected subcutaneously into female nude mice (N = 10 per group). Slow-release estrogen pellets were implanted into mice 72 hr prior to cell line injection. Tumor growth was measured at the indicated time points (error bars: SEM).

DOI: [10.7554/eLife.00358.030](https://doi.org/10.7554/eLife.00358.030)

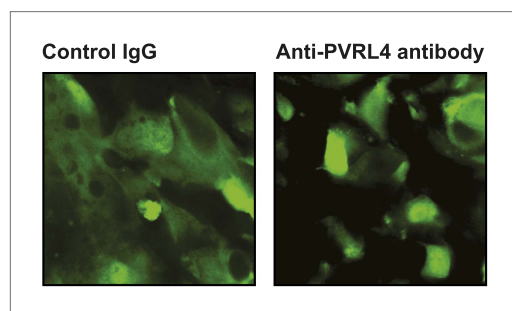

**Figure 7—figure supplement 2.** Anti-PVRL4 antibodies disrupt cell-cell contacts in xenografts in vivo. Freshly explanted tumors from control IgG or anti-PVRL4 antibody-treated mice (N = 3 per group) were visualized using a two-photon confocal microscope. Representative images are shown.

DOI: [10.7554/eLife.00358.031](https://doi.org/10.7554/eLife.00358.031)

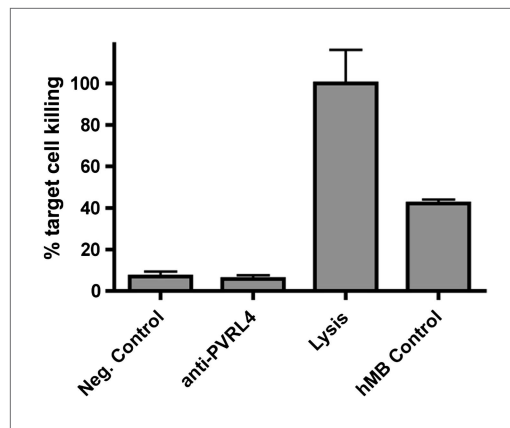

**Figure 7—figure supplement 3.** Anti-PVRL4 antibodies do not induce ADCC in vitro. Europium-labeled SUM190 cells were incubated with fresh human NK cells in the presence of an isotype control or anti-PVRL4 antibody, and the degree of lysis was measured by the DELFIA europium assay. The maximum signal was determined by a complete lysis of labeled SUM190 cells in DELFIA lysis buffer. As a positive control, hMB humanized mouse lymphoma cells were mixed with effector cells in the presence of ADCC-competent anti-CD52 antibody. ADCC: antibody-dependent cytotoxicity.  
DOI: [10.7554/eLife.00358.032](https://doi.org/10.7554/eLife.00358.032)

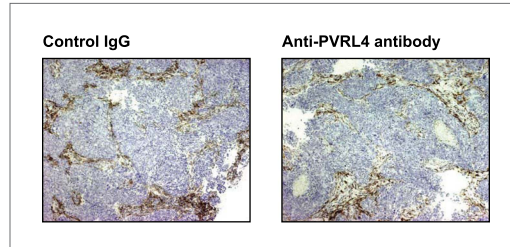

**Figure 7—figure supplement 4.** Anti-PVRL4 antibody treatment does not affect the degree of macrophage infiltration into SUM190 xenografts. Paraffin-embedded sections of SUM190 xenografts from mice treated with either control IgG or anti-PVRL4 antibody were stained with anti-mouse F4/80 antibody. Representative images are shown.  
DOI: [10.7554/eLife.00358.033](https://doi.org/10.7554/eLife.00358.033)

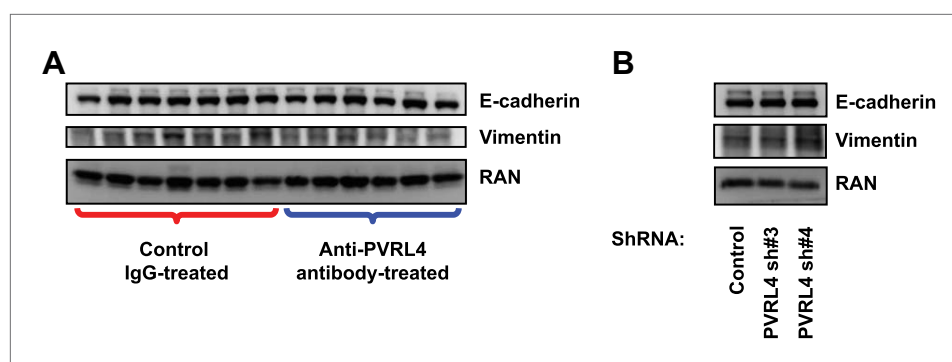

**Figure 7—figure supplement 5.** Inhibition of PVRL4 by antibodies or by RNAi does not affect expression of EMT markers. (A) Tumor lysates from control antibody- or anti-PVRL4 antibody-treated mice were blotted for E-cadherin and vimentin. (B) PVRL4 was stably depleted by two independent shRNAs in SUM190 cells and lysates were blotted for E-cadherin and vimentin.

DOI: [10.7554/eLife.00358.034](https://doi.org/10.7554/eLife.00358.034)

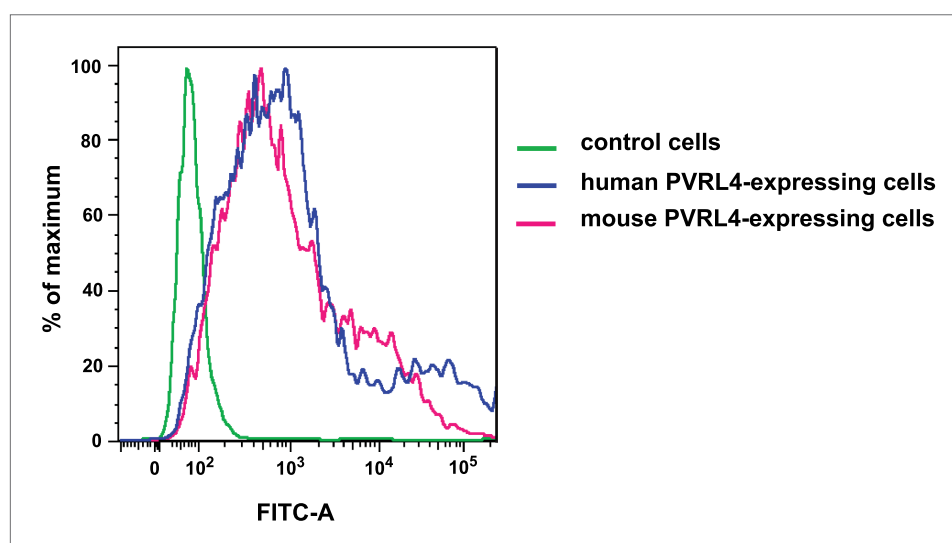

**Figure 7—figure supplement 6.** Anti-PVRL4 antibodies recognize both human and mouse epitopes. 293T cells were transfected with empty pQCXIN (green line), pQCXIN-human PVRL4 (blue line), or pCMV-SPORT6-mouse PVRL4 (magenta line). Live-cell FACS was performed with mouse anti-human PVRL4 antibody followed by anti-mouse secondary antibody conjugated to Alexa Fluor 488 fluorophore. The FITC-A fluorescent signal for three labeled cell populations is shown.

DOI: [10.7554/eLife.00358.035](https://doi.org/10.7554/eLife.00358.035)
